# Supplementary material for: An acidity-regulated double perovskite cathode for efficient and durable power generation of intermediate-temperature solid oxide fuel cells
Source: Royal Society of Chemistry journal article supplement (doi:10.1039/d4ta02853h), 2024-01-01
Supplement: d4ta02853h1.pdf [file d4ta02853h1.pdf]

## **Supporting Information**

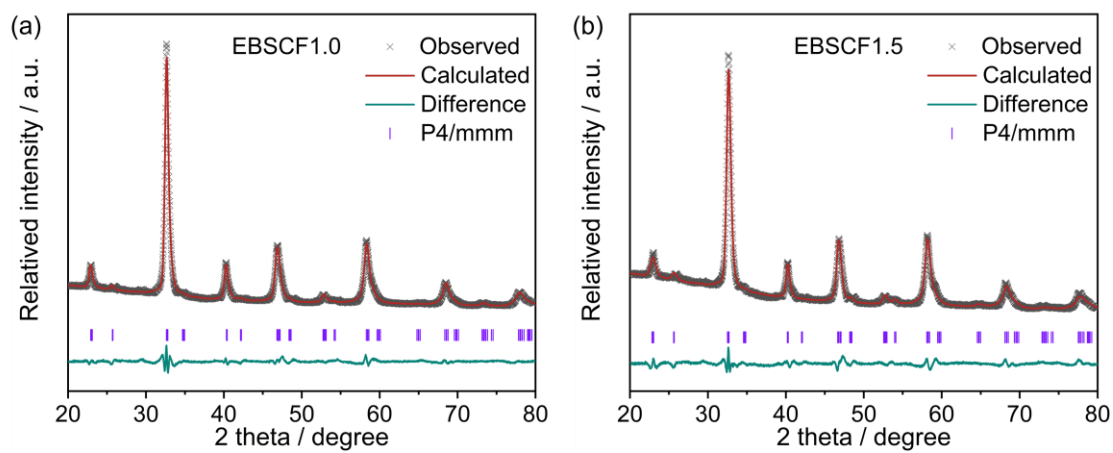

**Fig. S1** Rietveld refinement XRD patterns of (a) EBSCF1.0 and (b)EBSCF1.5.

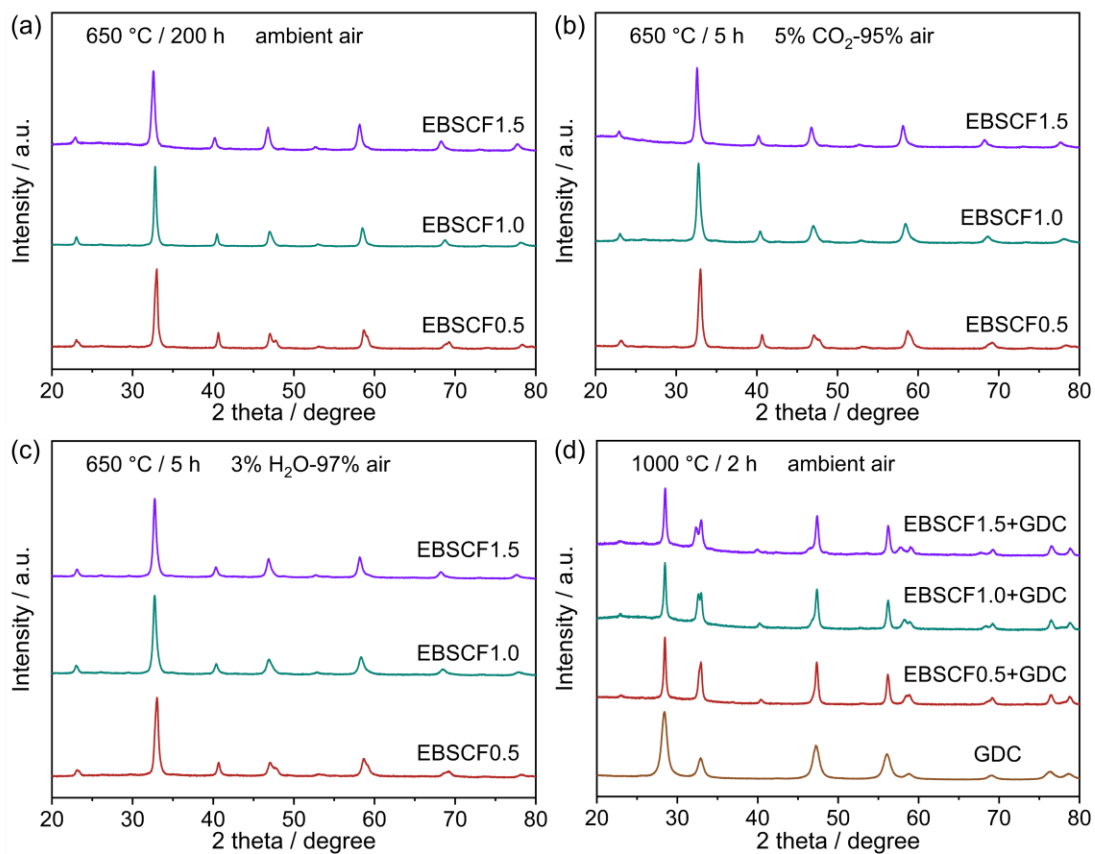

**Fig. S2** XRD patterns of EBSCF<sub>x</sub> (x = 0.5, 1.0, and 1.5) treated under different conditions: (a) 650 °C for 200 h in air, (b) 650 °C for 5 h in 5% CO<sub>2</sub>-95% air, (c) 650 °C for 5 h in 3% H<sub>2</sub>O-97% air, and (d) EBSCF-GDC composite with a mass ratio of 1:1 at 1000 °C for 2 h in air.

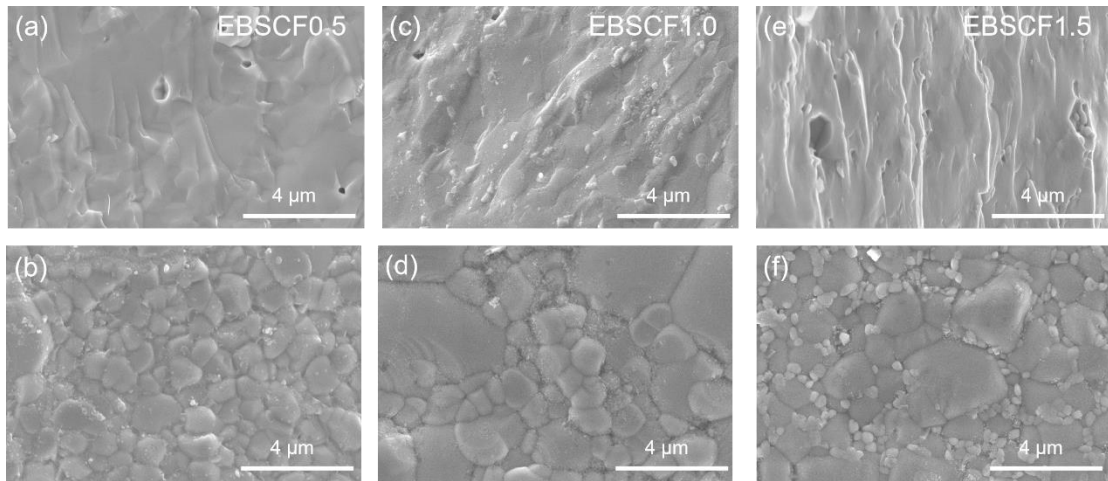

**Fig. S3** Cross-section and surface morphologies of dense bar samples sintering at 1250 °C for 5 h. (a)(b) EBSCF0.5, (c)(d) EBSCF1.0, and (e)(f) EBSCF1.5.

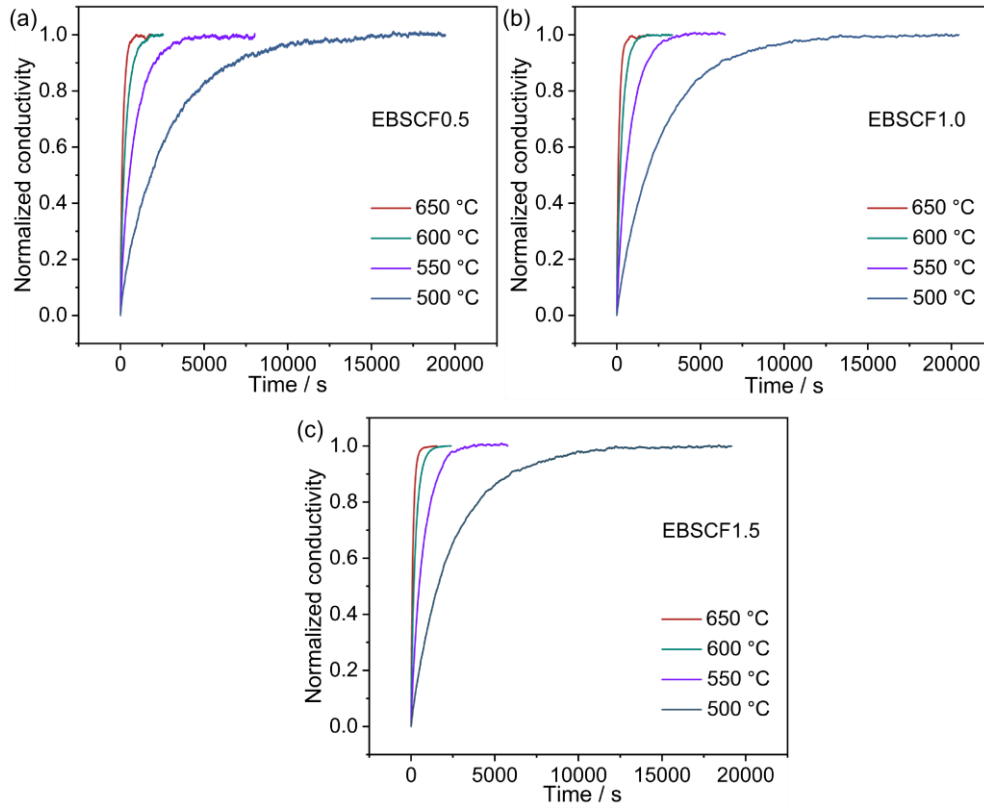

**Fig. S4** Normalized ECR curves of (a) EBSCF0.5, (b) EBSCF1.0, and (c) EBSCF1.5 obtained at various temperatures.

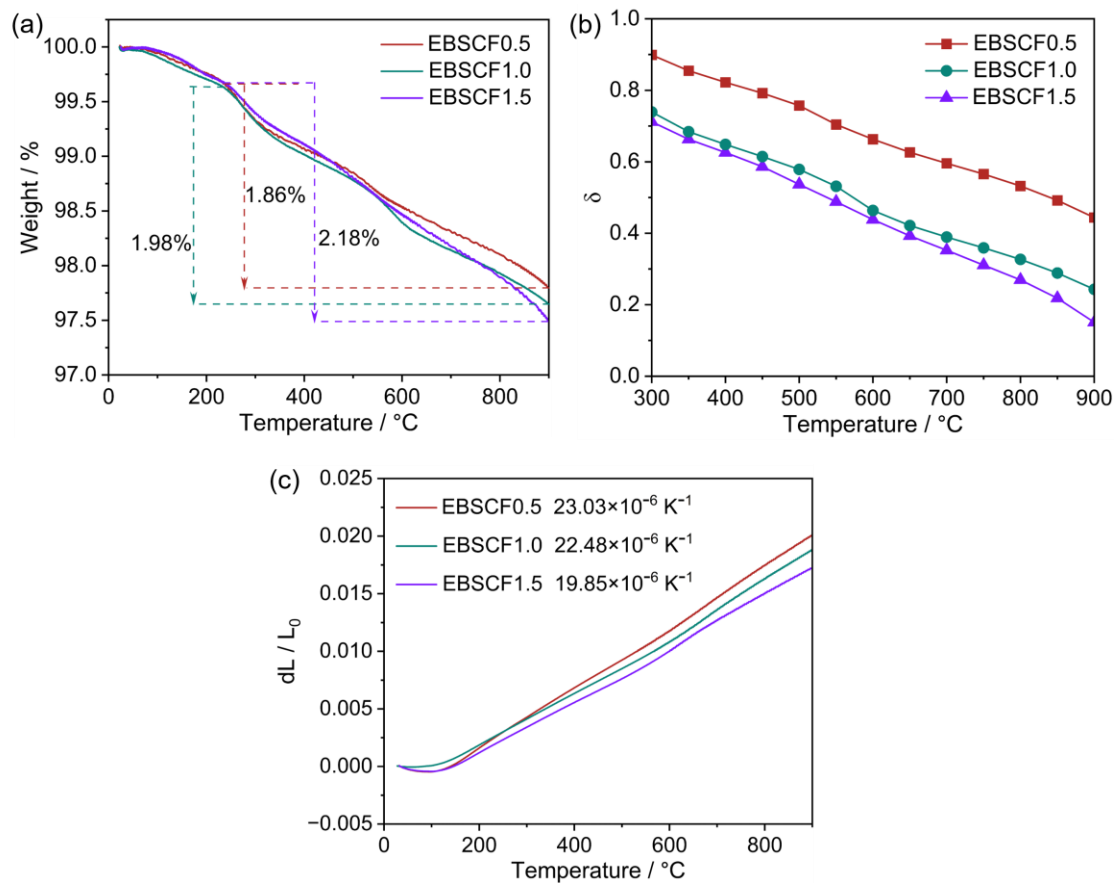

**Fig. S5** Thermal analysis for EBSCFx. (a) TGA curves for powder samples, (b) oxygen stoichiometry at the temperature from 300 to 900 °C, and (c) thermal expansion curves for dense bar samples.

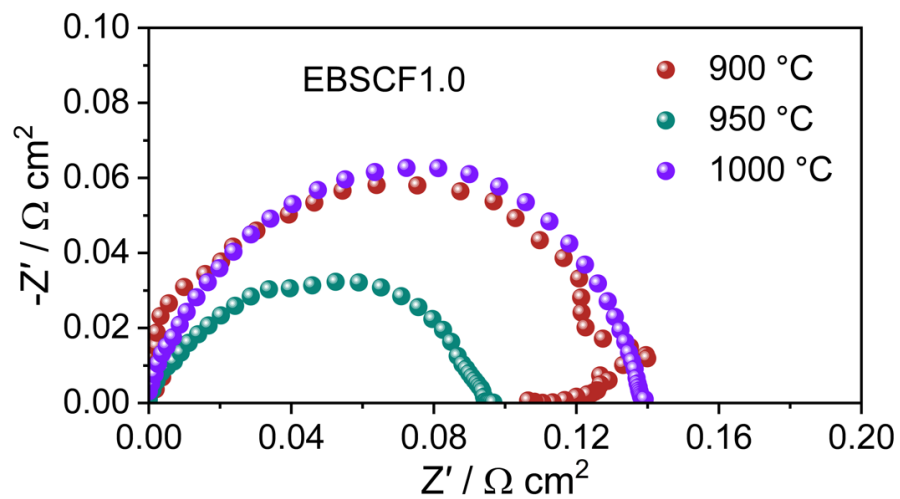

**Fig. S6** EIS plots of EBSCF1.0 symmetric cells tested at 650 °C under different sintering temperatures.

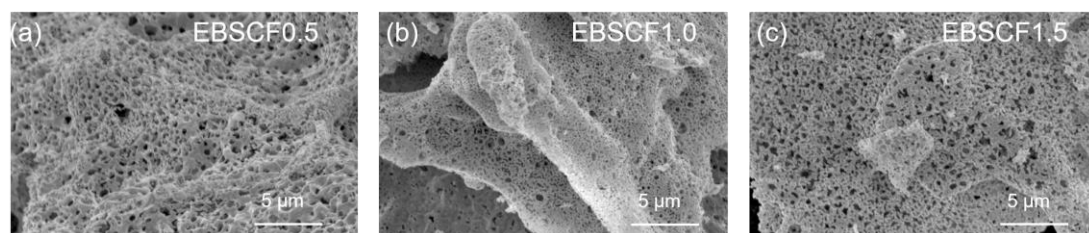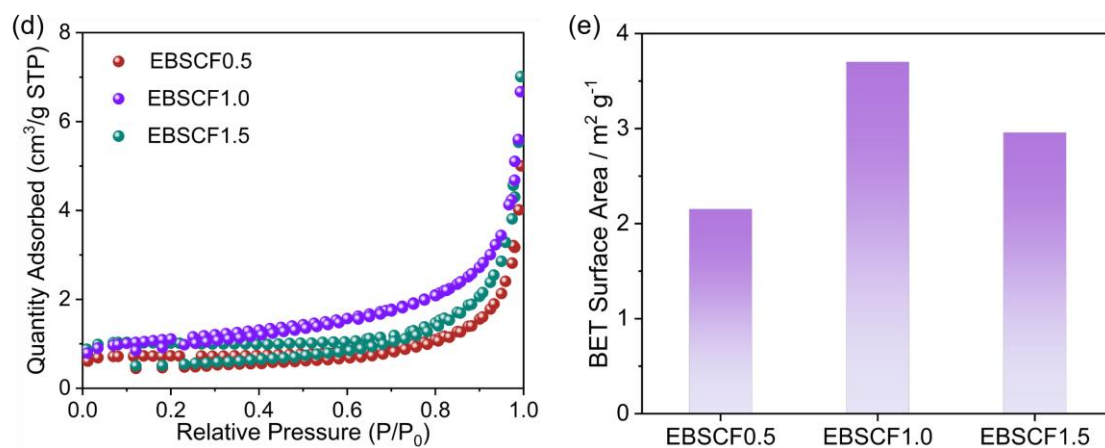

**Fig. S7** The SEM morphologies for the prepared powders of (a) EBSCF0.5, (b) EBSCF1.0, (c) EBSCF1.5. (d) N<sub>2</sub> adsorption-desorption isotherms of the EBSCFx samples. (e) BET surface areas of EBSCFx.



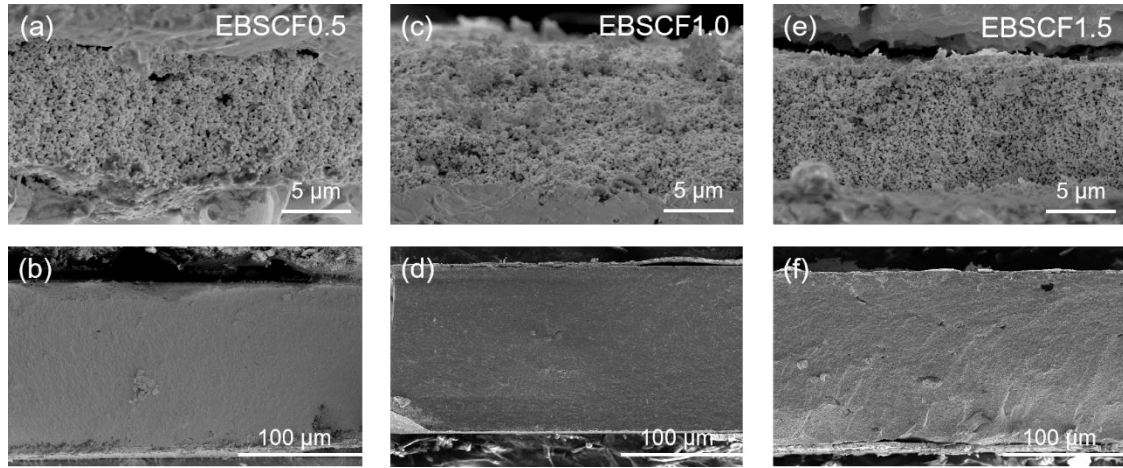

**Fig. S8** The section morphology of symmetrical cells after EIS measurement. (a)(c)(e) The full morphologies, and (b)(d)(f) the magnified morphologies of the EBSCFx electrode and GDC electrolyte.

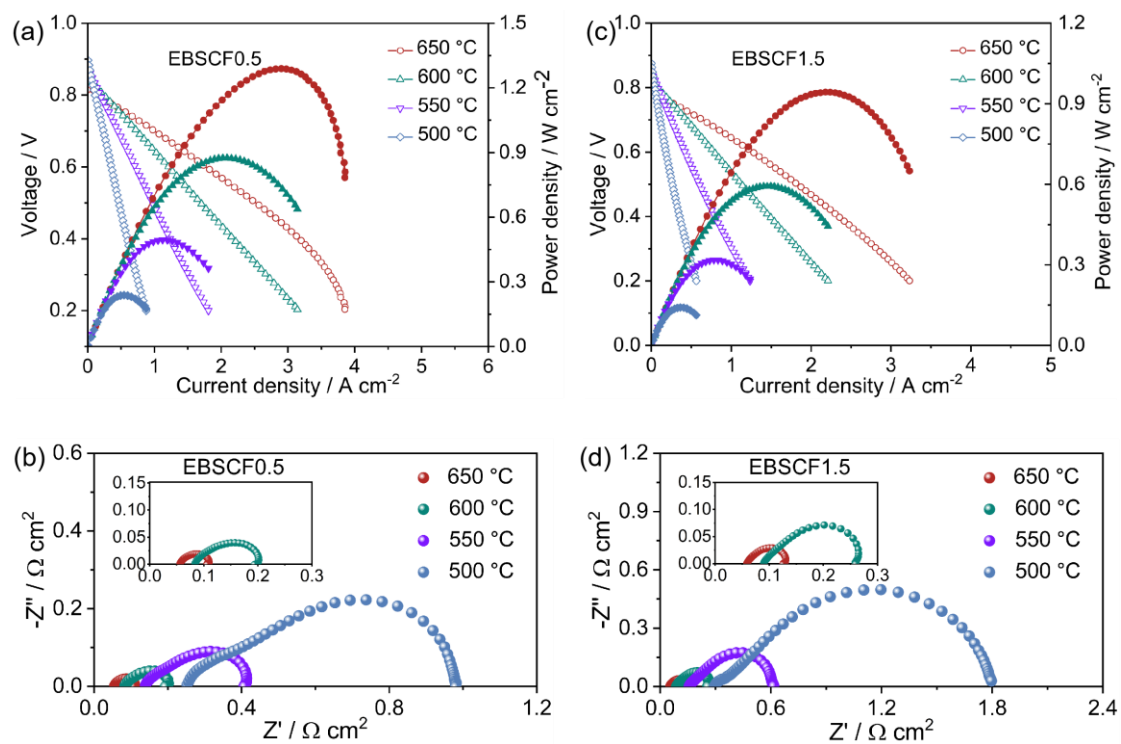

**Fig. S9** (a)  $I$ - $V$  and  $I$ - $P$  curves for a single cell using EBSCF0.5 cathode. (b) EIS of EBSCF0.5 cell. (c)  $I$ - $V$  and  $I$ - $P$  curves for a single cell using EBSCF1.5 cathode. (d) EIS of EBSCF1.5 cell.

**Table S1** XRD Rietveld refinement results of EBSCF<sub>x</sub> (x = 0.5, 1.0, and 1.5).

| Sample      |                             | EBSCF0.5  | EBSCF1.0                    | EBSCF1.5  |
|-------------|-----------------------------|-----------|-----------------------------|-----------|
| Space group |                             | P4/mmm    | P4/mmm                      | P4/mmm    |
|             | a= b (Å)                    | 3.8700(8) | 3.8781(5)                   | 3.8906(8) |
| Lattice     | c (Å)                       | 7.6571(4) | 7.7131(5)                   | 7.7345(2) |
| parameters  | V (Å <sup>3</sup> )         | 114.68    | 116.01                      | 117.08    |
|             | $\alpha/\beta/\gamma$ (deg) |           | $\alpha= \beta= \gamma= 90$ |           |
| Refinement  | $R_p$ (%)                   | 1.86      | 1.93                        | 2.44      |
| parameters  | $R_{wp}$ (%)                | 2.30      | 2.59                        | 3.13      |

**Table S2** The density of the measured bars for EBSCF<sub>x</sub>.

| Sample   | w <sub>1</sub> | w <sub>2</sub> | w <sub>3</sub> | D <sub>b</sub> |
|----------|----------------|----------------|----------------|----------------|
| EBSCF0.5 | 0.2351         | 0.2355         | 0.1960         | 99.0%          |
| EBSCF1.0 | 0.2240         | 0.2245         | 0.1858         | 98.7%          |
| EBSCF1.5 | 0.2242         | 0.2248         | 0.1849         | 98.5%          |

The subsequent equations (known as Archimedes' relations) are employed for the determination of the open porosity ( $P_o$ ) and density ( $D_b$ ) of the bars. Here,  $w_1$  represents the weight of the dry sample,  $w_2$  denotes the weight upon saturation, and  $w_3$  is the weight of the sample when immersed in distilled water.

$$P_o = \frac{w_2 - w_1}{w_2 - w_3} \times 100\%$$

$$D_b = 1 - P_o$$

**Table S3** The relative proportion of oxygen species for EBSCFx.

| Oxygen Species         | EBSCF0.5 | EBSCF1.0 | EBSCF1.5 |
|------------------------|----------|----------|----------|
|                        | %        | %        | %        |
| $O^{2-}$               | 23.6     | 29.1     | 33.1     |
| $O_2^{2-}$ and $O^-$   | 23.5     | 23.6     | 25.8     |
| $OH^-$ and $CO_3^{2-}$ | 37.5     | 20.0     | 26.6     |
| $H_2O$                 | 15.4     | 17.3     | 14.5     |

**Table S4** The relative proportion of the  $\text{Co}^{3+}$  and  $\text{Co}^{4+}$  for EBSCFx.

| Valence State         | EBSCF0.5 | EBSCF1.0 | EBSCF1.5 |
|-----------------------|----------|----------|----------|
|                       | %        | %        | %        |
| $\text{Co}^{4+}$      | 58.8     | 42.6     | 28.0     |
| $\text{Co}^{3+}$      | 41.2     | 57.4     | 72.0     |
| Average valence state | 3.59     | 3.43     | 3.28     |

**Table S5** The relative proportion of the Fe<sup>3+</sup> and Fe<sup>4+</sup> for EBSCF<sub>x</sub>.

| Valence State         | EBSCF0.5 | EBSCF1.0 | EBSCF1.5 |
|-----------------------|----------|----------|----------|
|                       | %        | %        | %        |
| Fe <sup>4+</sup>      | 64.9     | 46.1     | 43.1     |
| Fe <sup>3+</sup>      | 35.1     | 53.9     | 56.9     |
| Average valence state | 3.65     | 3.46     | 3.43     |

**Table S6** The average valence of B site elements for EBSCFx.

| Sample   | Average<br>valance of Co | Average<br>valance of Fe | Average valence<br>of B site |
|----------|--------------------------|--------------------------|------------------------------|
| EBSCF0.5 | 3.59                     | 3.65                     | 3.60                         |
| EBSCF1.0 | 3.43                     | 3.46                     | 3.44                         |
| EBSCF1.5 | 3.28                     | 3.43                     | 3.39                         |



**Table S7** ORR elementary reaction and process.<sup>S1-S2</sup>

| n     | ORR elementary reaction                                             | ORR process                                                      |
|-------|---------------------------------------------------------------------|------------------------------------------------------------------|
| 1     | $O_2(g) \rightarrow O_{2,ads}$                                      | gas diffusion and oxygen adsorption                              |
| 0.5   | $O_{2,ads} \rightarrow 2O_{ads}$                                    | oxygen surface adsorption dissociation                           |
| 0.375 | $O_{ads} + e' + V_{O,S}^{\cdot\cdot} \rightarrow O_{O,S}^{\cdot}$   | the first charge transfer process                                |
| 0.125 | $O_{O,S}^{\cdot} + e' \rightarrow O_{O,S}^{\times}$                 | the second charge transfer process                               |
| 0.25  | $O_{ads} + 2e' + V_{O(S)}^{\cdot\cdot} \rightarrow O_{O,S}^{\cdot}$ | the total charge transfer process                                |
| 0     | $O_{O,Cat}^{\times} \rightarrow O_{O,Ele}^{\times}$                 | the migration of oxygen ions from the cathode to the electrolyte |

**Table S8**  $R_p$  values of  $R_H$ ,  $R_I$ , and  $R_L$  under different oxygen partial pressures.

| $R_p$ ( $\Omega \cdot \text{cm}^2$ ) | Oxygen partial pressure (atm) |         |         |         |         |
|--------------------------------------|-------------------------------|---------|---------|---------|---------|
|                                      | 0.21                          | 0.30    | 0.50    | 0.70    | 1.00    |
| $R_H$                                | 0.00688                       | 0.00669 | 0.00614 | 0.00693 | 0.00690 |
| $R_I$                                | 0.10488                       | 0.11132 | 0.10192 | 0.09545 | 0.08776 |
| $R_L$                                | 0.01293                       | 0.00558 | 0.00416 | 0.00264 | 0.00138 |

**Table S9** Average binding energy of metal-oxygen for EBSCF.

| Sample   | <A-O> (kJ mol <sup>-1</sup> ) |        |        | <B-O> (kJ mol <sup>-1</sup> ) |        | <ABE><br>(kJ mol <sup>-1</sup> ) |
|----------|-------------------------------|--------|--------|-------------------------------|--------|----------------------------------|
|          | <Eu-O>                        | <Ba-O> | <Sr-O> | <Co-O>                        | <Fe-O> |                                  |
| EBSCF0.5 | -76.8                         | -20.4  | -21.0  | -132.9                        | -50.1  | -301.2                           |
| EBSCF1.0 | -76.8                         | -20.4  | -21.0  | -88.6                         | -100.2 | -307.0                           |
| EBSCF1.5 | -76.8                         | -20.4  | -21.0  | -44.3                         | -150.3 | -312.8                           |

The values of ABE are calculated by the following equations

$$\langle \text{ABE} \rangle = \langle \text{A-O} \rangle + \langle \text{B-O} \rangle \quad (1)$$

$$\langle \text{A-O} \rangle = \frac{x_A}{n \times \text{CN}_A} \times \left( \Delta H_{A_n O_m} - n \Delta H_A - \frac{m}{2} \times D_{O_2} \right) \quad (2)$$

$$\langle \text{B-O} \rangle = \frac{x_B}{n \times \text{CN}_B} \times \left( \Delta H_{B_n O_m} - n \Delta H_B - \frac{m}{2} \times D_{O_2} \right) \quad (3)$$

Where  $x_A$  and  $x_B$  are the molar ratios of A and B metals.  $\text{CN}_{A(B)}$  is the coordination number of cations on the A and B sites ( $\text{CN}_{Eu} = 9$ ,  $\text{CN}_{Sr(Ba)} = 12$ , and  $\text{CN}_{Co(Fe)} = 6$ ).  $\Delta H_{A(B)_n O_m}$  is the standard molar enthalpies of formation one mole of A(B)<sub>m</sub>O<sub>n</sub> oxides,  $\Delta H_{A(B)}$  is the sublimation energy of A(B) metal, and  $D_{O_2}$  (= 500.2 kJ mol<sup>-1</sup>) is the dissociation energy of gaseous oxygen.<sup>S3</sup>  $\Delta H_{Eu_2O_3} = -1657.9$ ,  $\Delta H_{BaO} = -548$ ,  $\Delta H_{SrO} = -592$ ,  $\Delta H_{Co_3O_4} = -910.0$ ,  $\Delta H_{Fe_2O_3} = -823$ ,  $\Delta H_{Eu} = 178$ ,  $\Delta H_{Ba} = 179.1$ ,  $\Delta H_{Sr} = 164$ ,  $\Delta H_{Co} = 426.7$ ,  $\Delta H_{Fe} = 415.3$  kJ mol<sup>-1</sup>.

- S1. M. Li, Y. Ren, Z. Zhu, S. Zhu, F. Chen, Y. Zhang and C. Xia, *Electrochim. Acta*, 2016, **191**, 651-660.
- S2. L. Shen, Z. Du, Y. Zhang, X. Dong, and H. Zhao, *Applied Catalysis B: Environmental*, 2021, **295**, 120264.
- S3. X. Ding, Z. Gao, D. Ding, X. Zhao, H. Hou, S. Zhang, G. Yuan, *Applied Catalysis B: Environmental*, 2019, **243**, 546-555.
